1 **Xrp1 and Irbp18 trigger a feed-forward loop of proteotoxic stress**  
2 **to induce the loser status**

3  
4  
5

6 Paul F. Langton<sup>1\*</sup>, Michael E. Baumgartner<sup>1</sup>, Remi Logeay<sup>1</sup> and Eugenia Piddini<sup>1\*</sup>

7  
8  
9

10 **Affiliations**

11  
12

13 <sup>1</sup> School of Cellular and Molecular Medicine, University of Bristol, Biomedical Sciences  
14 Building, University Walk, Bristol BS8 1TD, UK.

15

16 \* Correspondence should be addressed to Paul F. Langton: [paul.langton@bristol.ac.uk](mailto:paul.langton@bristol.ac.uk) or  
17 Eugenia Piddini: [eugenia.piddini@bristol.ac.uk](mailto:eugenia.piddini@bristol.ac.uk)

18  
19  
20  
21

22 **Keywords:** Cell competition, ribosome mutation, proteotoxic stress, *Drosophila*, Nuclear  
23 factor erythroid 2-related factor 2, Inverted repeat binding protein 18 kDa, Xrp1, Unfolded  
24 protein response, ER stress, eukaryotic translation initiation factor 2 subunit alpha, CHOP,  
25 Integrated stress response.

26  
27  
28  
29

30  
31  
32  
33  
34  
35  
36  
37  
38  
39  
40  
41  
42  
43  
44  
45  
46  
47  
48  
49  
50  
51  
52  
53  
54  
55  
56  
57  
58  
59  
60  
61  
62

## Abstract

Cell competition induces the elimination of less-fit “loser” cells by fitter “winner” cells. In *Drosophila*, cells heterozygous mutant in ribosome genes, *Rp/+*, known as Minutes, are eliminated via cell competition by wild-type cells. *Rp/+* cells display proteotoxic stress and the oxidative stress response, which drive the loser status. Minute cell competition also relies on the activities of the transcription factors Irbp18 and Xrp1, however how these contribute to the loser status is partially understood. Here, we show that Irbp18 and Xrp1 induce the loser status by promoting proteotoxic stress. We find that Xrp1 is necessary for *Rp/+* - induced proteotoxic stress and is sufficient to induce proteotoxic stress in otherwise wild-type cells. Xrp1 is also induced downstream of proteotoxic stress and required for the competitive elimination of cells suffering from proteotoxic stress. Our data suggests that a feed-forward loop between Xrp1, proteotoxic stress, and Nrf2 drives Minute cells to become losers.

63

64

## Introduction

65

66 Cells within a tissue may become damaged due to spontaneous or environmentally induced  
67 mutations, and it is beneficial to organismal health if these cells are removed and replaced by  
68 healthy cells. During cell competition, fitter cells, termed winners, recognise and eliminate  
69 less-fit cells, termed losers, resulting in restoration of tissue homeostasis (Amoyel & Bach,  
70 2014; Baker, 2011; Maruyama & Fujita, 2017). Cell competition therefore promotes tissue  
71 health and is thought to provide a level of protection against developmental aberrations  
72 (Baillon & Basler, 2014; Baker, 2017; Vincent, Kolahgar, Gagliardi, & Piddini, 2011) and  
73 against cancer by removing cells carrying oncoplastic mutations (Maruyama & Fujita, 2017;  
74 Vishwakarma & Piddini, 2020). However, an increasing body of evidence indicates that cell  
75 competition can also promote growth of established tumours, enabling them to expand at the  
76 expense of surrounding healthy cells (Vishwakarma & Piddini, 2020).

77

78 Minute cell competition was discovered through the study of a class of *Drosophila* ribosomal  
79 mutations called *Minutes* (Morata & Ripoll, 1975) and initial work suggests that it is  
80 conserved in mammals (Oliver, Saunders, Tarle, & Glaser, 2004). While homozygous *Rp*  
81 mutations are mostly cell lethal, heterozygosity for most *Rp* mutations gives rise to viable  
82 adult flies that exhibit a range of phenotypes including developmental delay and shortened  
83 macrochaete bristles (Marygold et al., 2007; Morata & Ripoll, 1975). *Rp/+* tissues display a  
84 higher cell-autonomous death frequency than wild-type tissues (Akai, Ohsawa, Sando, &  
85 Igaki, 2021; Baumgartner, Dinan, Langton, Kucinski, & Piddini, 2021; Coelho et al., 2005;  
86 Recasens-Alvarez et al., 2021). Competitive interactions further elevate cell death in *Rp/+*  
87 cells bordering wild-type cells, contributing to progressive loss of *Rp/+* clones over time  
88 (Baker, 2020; Baumgartner et al., 2021).

89

90 It was suggested that *Rp/+* cells are eliminated by cell competition due to their reduced  
91 translation rate (Amoyel & Bach, 2014; Kale et al., 2018; Lee et al., 2018; Milan, 2002;  
92 Moreno & Basler, 2004; Nagata, Nakamura, Sanaki, & Igaki, 2019). However, we and others  
93 have recently shown that *Rp/+* cells experience significant proteotoxic stress and this is the  
94 main driver of their loser status (Baumgartner et al., 2021; Recasens-Alvarez et al., 2021).  
95 *Rp/+* cells have a stoichiometric imbalance of ribosome subunits, which may provide the

96 source of proteotoxic stress. The autophagy and proteasomal machineries become overloaded  
97 and protein aggregates build up in *Rp/+* cells, leading to activation of stress pathways. This  
98 includes activation of Nuclear factor erythroid 2-related factor 2 (Nrf2) and of the oxidative  
99 stress response (Ma, 2013), which we have shown to be sufficient to cause the loser status  
100 (Kucinski, Dinan, Kolahgar, & Piddini, 2017). Restoring proteostasis in *Rp/+* cells  
101 suppresses the activation of the oxidative stress response and inhibits both autonomous and  
102 competitive cell death (Baumgartner et al., 2021; Recasens-Alvarez et al., 2021).

103

104 Genetic screening for suppressors of cell competition led to the identification of Xrp1  
105 (Baillon, Germani, Rockel, Hilchenbach, & Basler, 2018; Lee et al., 2018), a basic leucine  
106 Zipper (bZip) transcription factor. Loss of Xrp1 rescues both the reduced growth and  
107 competitive cell death of *Rp/+* clones in mosaic tissues. Consistently, loss of Xrp1 restores  
108 translation rates and abolishes the increased JNK pathway activity characteristic of *Rp/+* cells  
109 (Lee et al., 2018). Xrp1 forms heterodimers with another bZip transcription factor called  
110 Inverted repeat binding protein 18kDa (Irbp18) (Francis et al., 2016; Reinke, Baek,  
111 Ashenberg, & Keating, 2013), and removal of Irbp18 also strongly suppresses the  
112 competitive elimination of *Rp/+* clones in mosaic tissues (Blanco, Cooper, & Baker, 2020).  
113 Irbp18 and Xrp1 are transcriptionally upregulated and mutually required for each other's  
114 expression in *Rp/+* cells, suggesting they function together in Minute cell competition  
115 (Blanco et al., 2020). Irbp18 forms heterodimers with another bZip transcription factor,  
116 ATF4 (Reinke et al., 2013). Knockdown of ATF4 in *Rp/+* cells reduces their survival in  
117 mosaic tissues, which is the opposite effect to knockdown of Xrp1 or Irbp18. This has been  
118 interpreted to suggest that the ATF4-Irbp18 heterodimer acts independently to the Xrp1-  
119 Irbp18 heterodimer (Blanco et al., 2020).

120

121 How Xrp1/Irbp18 contribute to the loser status is not clear. Given the recently identified role  
122 of proteotoxic stress in cell competition we sought to establish whether Xrp1/Irbp18 and  
123 proteotoxic stress act in a linear pathway or independently contribute to cell competition in  
124 *Rp/+* cells. We identify a feed-forward loop between Xrp1/Irbp18 and proteotoxic stress,  
125 which is required for downstream activation of the oxidative stress response and the loser  
126 status. We find that the initial insult in *Rp/+* cells is ribosomal imbalance-induced proteotoxic  
127 stress. Xrp1 is transcriptionally activated downstream of proteotoxic stress both by the  
128 Unfolded Protein Response (UPR) and by Nrf2. The Xrp1-Irbp18 complex then induces  
129 further proteotoxic stress, completing the feed-forward loop. This work provides new insight

130 into the interactions between the stress signalling pathways active in *Rp/+* cells and provides  
131 a mechanism for how the Xrp1-Irbp18 heterodimer mediates the competitive elimination of  
132 *Rp/+* cells by wild-type cells.

133

134

## Results

135

136 To probe the role of the Xrp1-Irbp18 complex in *Rp/+* cells, we first established whether  
137 RNAi lines against each functionally knock-down these genes. *xrp1* expression depends on  
138 its own activity and on the activity of Irbp18 (Blanco et al., 2020). As expected, knockdown  
139 of Xrp1 (*xrp1*<sup>KK104477</sup> RNAi line, hereafter referred to as *xrp1-RNAi*) in the posterior  
140 compartment of wild type wing discs reduced expression of an *xrp1* transcriptional reporter,  
141 *xrp1-lacZ* (Figure S1a-b). Similarly, knockdown of Irbp18 (*irbp18*<sup>KK110056</sup> RNAi line,  
142 hereafter referred to as *irbp18-RNAi*) reduced levels of *xrp1-lacZ* (Figure S1c-d). Mutations  
143 in *xrp1* and *irbp18* prevent *Rp/+* cells from being out-competed by wild-type cells in mosaic  
144 tissues (Baillon et al., 2018; Blanco et al., 2020; Lee et al., 2018). Accordingly, knockdown  
145 of Xrp1 or Irbp18 rescued the competitive elimination of *Rp/+* cells in wing discs. Compared  
146 to *Rp/+* clones, *Rp/+* clones expressing *xrp1-RNAi* (Figure S1e-g), or *irbp18-RNAi* (Figure  
147 S1h-j) grew substantially larger. These data indicate that those RNAi lines effectively  
148 knockdown Xrp1 and Irbp18.

149

150 To investigate the role of Xrp1 and Irbp18 in proteotoxic stress and the oxidative stress  
151 response, which are primary drivers of the loser status in *Rp/+* cells (Baumgartner et al.,  
152 2021; Kucinski et al., 2017; Recasens-Alvarez et al., 2021), we expressed *xrp1-RNAi*  
153 specifically in the posterior compartment of *Rp/+* wing discs with the *hedgehog (hh)-gal4*  
154 driver. Xrp1 knockdown significantly rescued the accumulation of phosphorylated-eukaryotic  
155 Initiation Factor 2 $\alpha$  (p-eIF2 $\alpha$ ), a marker of the integrated stress response, which is induced in  
156 response to proteotoxic stress (Cnop, Toivonen, Igoillo-Esteve, & Salpea, 2017; Hetz, 2012),  
157 and is upregulated in *Rp/+* cells (Figure 1a-b). Xrp1 knockdown also strongly inhibited the  
158 oxidative stress response in *Rp/+* cells, as it reduced the expression of Glutathione S  
159 transferase D1-GFP (GstD1-GFP), a reporter of Nrf2 (Sykiotis & Bohmann, 2008) (Figure 1a  
160 and c). Irbp18 knockdown also rescued both p-eIF2 $\alpha$  upregulation and GstD1-GFP  
161 upregulation in *Rp/+* discs (Figure 1d-f). Refractory to sigma P (Ref(2)p), also known as p62,  
162 is an autophagy adaptor and cargo (Mauvezin, Ayala, Braden, Kim, & Neufeld, 2014) and a

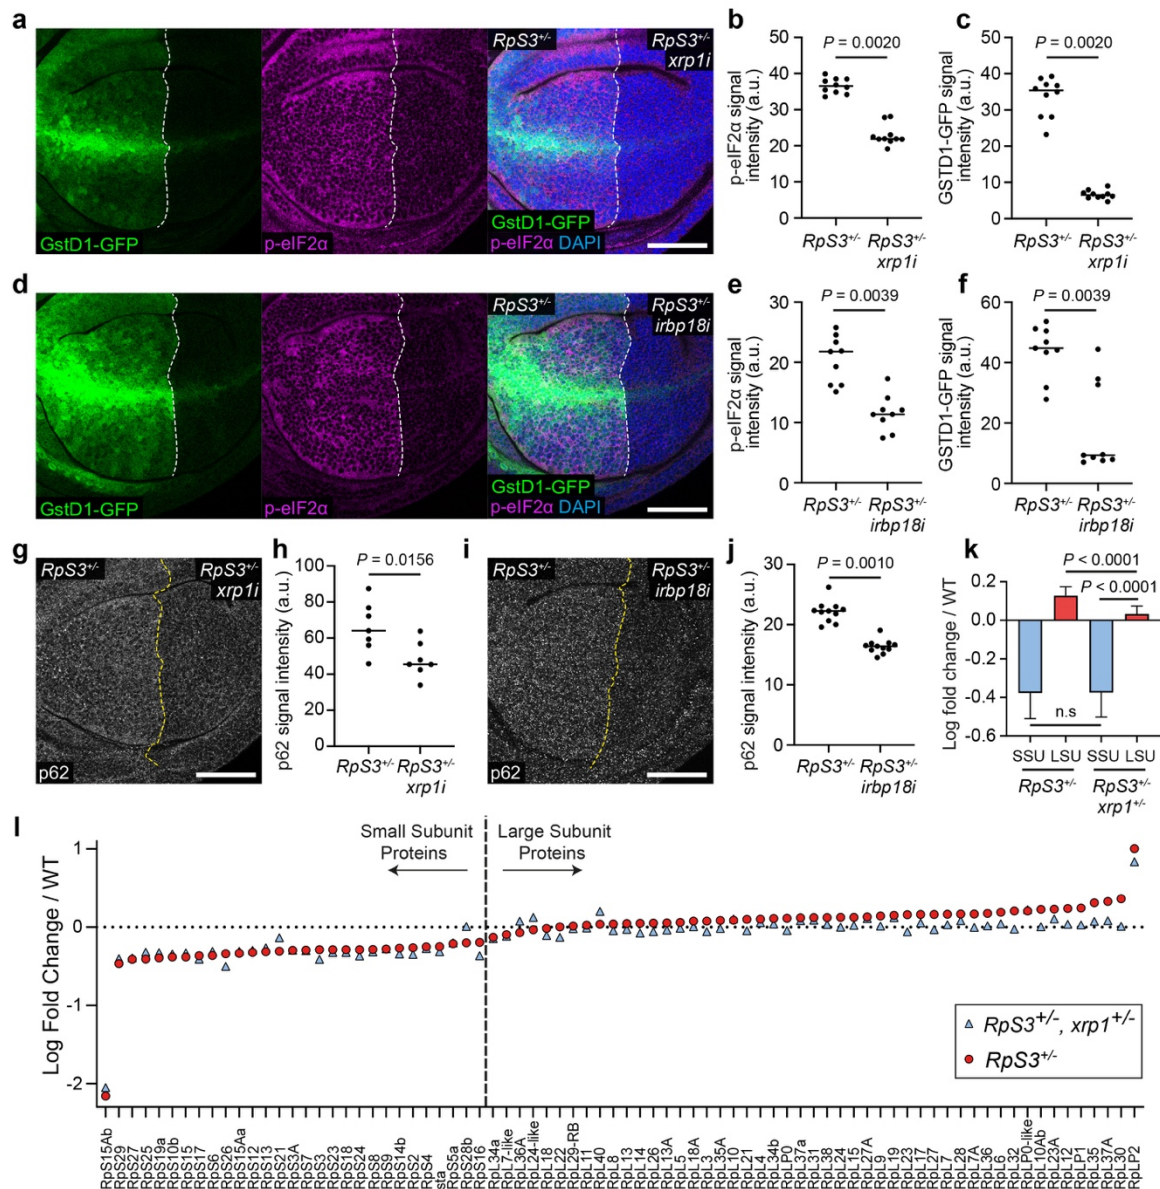

**Figure 1. Xrp1 and Irbp18 are required for proteotoxic stress and the oxidative stress response induced by Rp loss.** (a-c) An *RpS3*<sup>+/-</sup> wing disc harboring the GSTD1-GFP reporter (green) and expressing *xrp1*-RNAi (*xrp1i*) in the posterior compartment, immunostained for p-eIF2 $\alpha$  (magenta) with nuclei labelled in blue (a). Quantifications of p-eIF2 $\alpha$  signal intensity (n = 10; two-sided Wilcoxon signed-rank test) and GSTD1-GFP signal intensity (n = 10; two-sided Wilcoxon signed-rank test) are shown in (b) and (c) respectively. (d-f) An *RpS3*<sup>+/-</sup> wing disc harboring the GSTD1-GFP reporter (green) and expressing *irbp18*-RNAi (*irbp18i*) in the posterior compartment, immunostained for p-eIF2 $\alpha$  (magenta) with nuclei labelled in blue (d). Quantifications of p-eIF2 $\alpha$  signal intensity (n = 9; two-sided Wilcoxon signed-rank test) and GSTD1-GFP signal intensity (n = 9; two-sided Wilcoxon signed-rank test) are shown in (e) and (f) respectively. (g-h) A wing disc of the same

genotype as shown in **(a)**, immuno-stained for p62 (grey) **(g)**, with quantification of p62 signal intensity **(h)** ( $n = 7$ ; two-sided Wilcoxon signed-rank test). **(i-j)** A wing disc of the same genotype as shown in **(b)**, immuno-stained for p62 (grey) **(i)**, with quantification of p62 signal intensity **(j)** ( $n = 11$ ; two-sided Wilcoxon signed-rank test). **(k)** A bar graph showing the mean log fold change in all Small-subunit (SSU) and Large-subunit (LSU) ribosomal proteins detected by mass spectrometry in  $RpS3^{+/-}$  and  $RpS3^{+/-}, Xrp1^{+/-}$  wing discs relative to wild-type discs, as indicated ( $n = 29$ ; two-sided Wilcoxon signed-rank test for comparison of SSU,  $n = 49$ ; two-sided Wilcoxon signed-rank test for comparison of LSU,  $n = 29$  and  $49$ , respectively; two-sided Mann–Whitney U-test for comparison of SSU and LSU in  $RpS3^{+/-}, Xrp1^{+/-}$  wing discs), error bars represent 95% confidence interval. **(l)** Mean log fold change in SSU and LSU ribosomal proteins detected by mass spectrometry ( $n = 2$ ) in  $RpS3^{+/-}$  and  $RpS3^{+/-}, Xrp1^{+/-}$  wing discs relative to wild-type discs, as indicated. In this figure and throughout: scale bars are  $50\mu\text{m}$ ; dashed white or yellow lines mark compartment boundaries; each data point on the scatter plots represents one wing disc or one wing disc compartment and the horizontal line represents the median; all  $n$  values refer to the number of individual wing discs except for Figure 1k-l; posterior is right and dorsal is up.

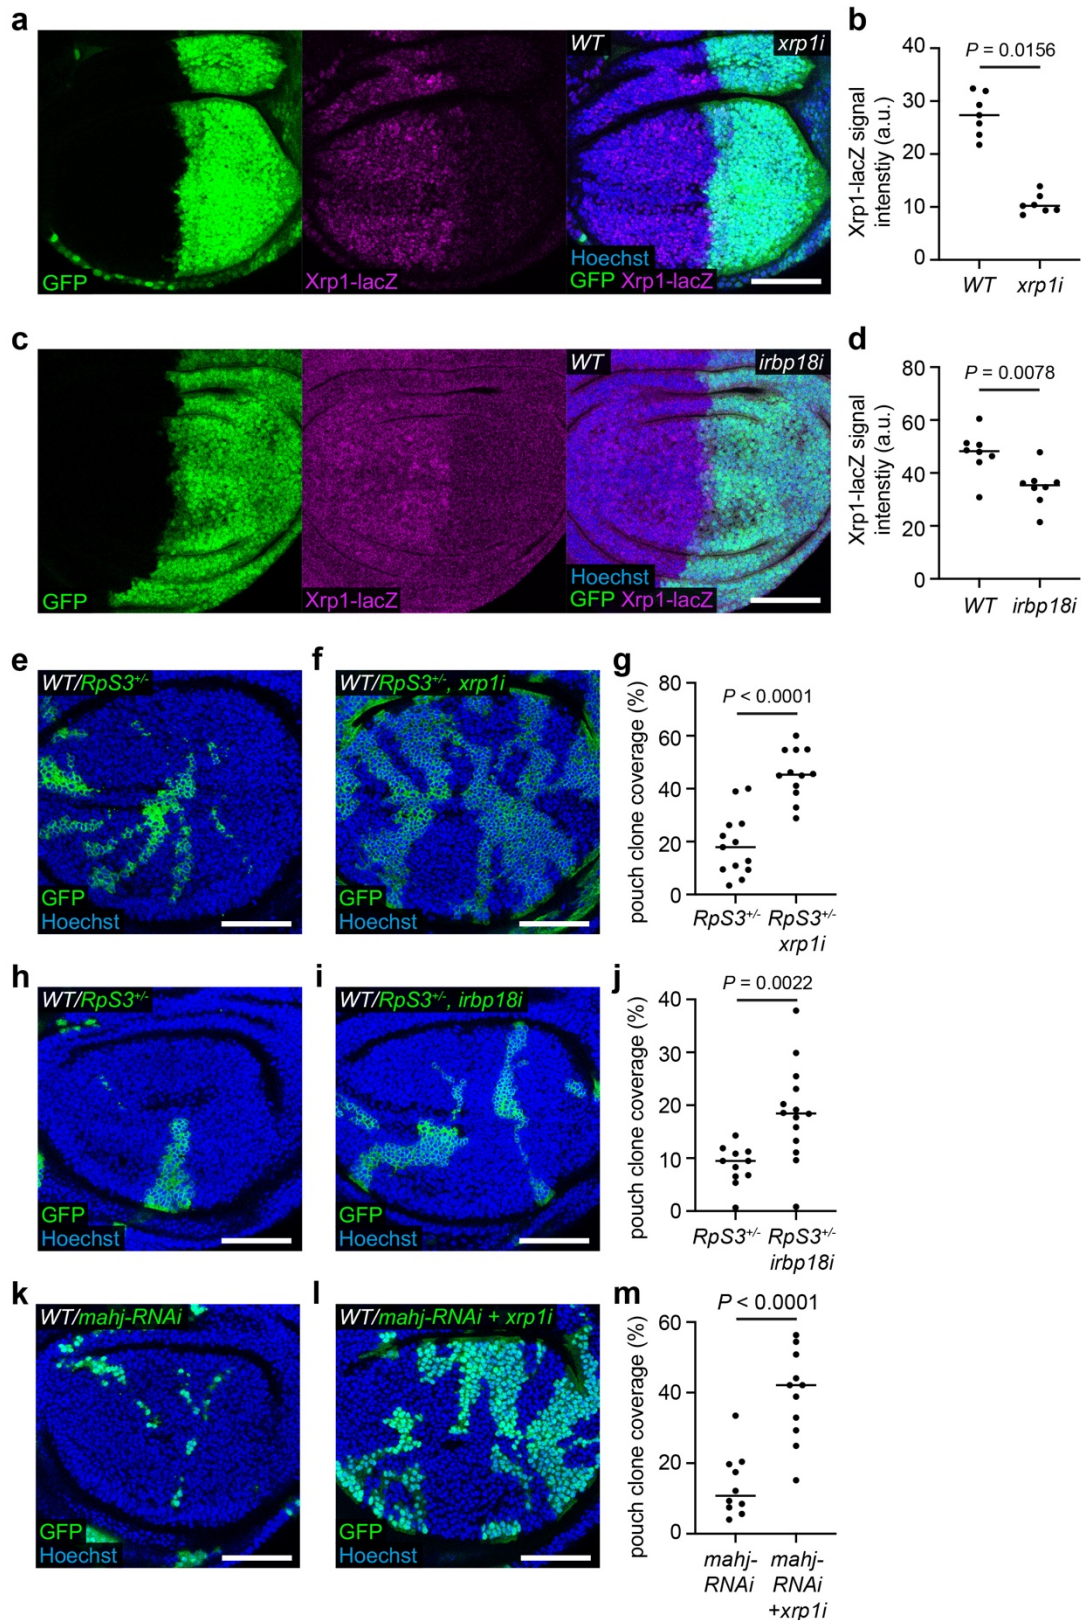

**Figure S1. Xrp1 or Irbp18 knockdown reduces *xrp1* transcription and rescues elimination of *Rp*<sup>+/+</sup> cells. (a-b)** A wing disc carrying the *xrp1-lacZ* reporter and expressing *xrp1-RNAi* (*xrp1i*) and GFP (green) in the posterior compartment, immuno-stained with anti-



$\beta$ -galactosidase (magenta) and nuclei labelled with in blue (**a**), with quantification of *xrpI-lacZ* signal intensity (**b**) ( $n = 7$ ; two-sided Wilcoxon signed-rank test). (**c-d**) A wing disc carrying the *xrpI-lacZ* reporter and expressing *irbp18-RNAi* (*irbp18i*) and *GFP* (green) in the posterior compartment, immuno-stained with anti- $\beta$ -galactosidase (magenta) and nuclei labelled in blue (**c**), with quantification of *xrpI-lacZ* signal intensity (**d**) ( $n = 8$ ; two-sided Wilcoxon signed-rank test). (**e-g**) Wild-type wing discs harboring *RpS3<sup>+/-</sup>* clones (*GFP* positive) (**e**) or *RpS3<sup>+/-</sup>* clones also expressing *xrpI-RNAi* (*GFP* positive) (**f**) with nuclei labelled in blue, and quantification of percentage clone coverage of the pouch (**g**) ( $n = 13$  and  $12$ , respectively; two-sided Student's t-test). (**h-j**) Wild-type wing discs harboring *RpS3<sup>+/-</sup>* clones (*GFP* positive) (**h**) or *RpS3<sup>+/-</sup>* clones also expressing *irbp18-RNAi* (*GFP* positive) (**i**) with nuclei labelled in blue, and quantification of percentage clone coverage of the pouch (**j**) ( $n = 11$  and  $14$ , respectively; two-sided Student's t-test). (**k-m**) Wild-type wing discs harboring *mahj-RNAi* clones (*GFP* positive) (**k**) or *mahj-RNAi* clones also expressing *xrpI-RNAi* (*GFP* positive) (**l**) with nuclei labelled in blue, and quantification of percentage clone coverage of the pouch (**m**) ( $n = 10$  and  $11$ , respectively; two-sided Student's t-test).

163 marker of cytosolic protein aggregates (Nezis et al., 2008), which accumulates in *Rp/+* cells  
164 due to proteotoxic stress overload (Baumgartner et al., 2021). The accumulation of p62-  
165 labelled aggregates in *Rp/+* cells was rescued both by *xrp-RNAi* (Figure 1g-h) and *irbp18-*  
166 *RNAi* (Figure 1i-j), further indicating that proteotoxic stress in *Rp/+* cells is mediated by the  
167 Xrp1/Irbp18 complex. Together, these data show that Xrp1 and Irbp18 are required for, and  
168 act upstream of, proteotoxic stress and the oxidative stress response in *Rp/+* cells.

169

170 Mutations in the E3 ubiquitin ligase encoding gene *mahjong* (*mahj*) lead to the loser status,  
171 and *mahj*<sup>-/-</sup> cells are out-competed by wild-type cells in mosaic tissues (Tamori et al., 2010).  
172 Although Mahj is functionally distinct to ribosomal proteins, the gene expression signatures  
173 of *mahj* and *RpS3* mutants significantly overlap (Kucinski et al., 2017), indicating a common  
174 mechanism leading to the loser status. Indeed, *mahj* cells also show upregulation of markers  
175 of proteotoxic stress (Baumgartner et al., 2021). Interestingly, Xrp1 knockdown rescued  
176 *mahj-RNAi* expressing clones from elimination in mosaic wing discs (Figure S1k-m). Thus,  
177 Xrp1 contributes to the competitive elimination of cells deficient in two distinct loser  
178 mutations, *Rp/+* and *mahj*, which are both linked to proteotoxic stress.

179

180 *Rp/+* cells have recently been shown to have a stoichiometric imbalance in their ribosome  
181 subunits, suggesting that this is the initial proteostatic perturbation leading to proteotoxic  
182 stress. Specifically, *Rp/+* cells have an excess of large-subunit (LSU) proteins and a reduced  
183 complement of small-subunit (SSU) proteins, relative to wild-type cells (Baumgartner et al.,  
184 2021; Recasens-Alvarez et al., 2021). The data in Figure 1a-j indicate that proteotoxic stress  
185 is induced by Xrp1 and Irbp18 in *Rp/+* cells, therefore we asked whether the ribosomal  
186 imbalance in *Rp/+* cells is also downstream of Xrp1. Interestingly, proteomic analysis  
187 revealed that removal of one copy of *xrp1*, which is sufficient to rescue *Rp/+* cells from  
188 competition (Lee et al., 2018), rescues the excess of LSU proteins but does not affect the  
189 reduction in SSU proteins (Figure 1k-l). Thus, SSU protein imbalance is independent of  
190 Xrp1. This suggests that the initial proteotoxic stress experienced by *Rp/+* cells is an  
191 SSU/LSU stoichiometric imbalance. This may provide the signal for Xrp1 induction, which  
192 in turn exacerbates proteotoxic stress, resulting in accumulation of LSU proteins.

193

194 The results described above suggest that Xrp1 functions upstream of proteotoxic stress in  
195 *Rp/+* cells, so we asked whether Xrp1 is sufficient to induce proteotoxic stress. We over-  
196 expressed the *xrp1<sup>long</sup>* isoform (Tsurui-Nishimura et al., 2013) in the posterior compartment

197 of wing discs with the *engrailed (en)-gal4* driver and found this condition to be larval lethal  
198 before the 3<sup>rd</sup> instar, which is consistent with previous reports that *xrp1* over-expression  
199 induces high levels of cell death (Blanco et al., 2020; Boulan, Andersen, Colombani, Boone,  
200 & Leopold, 2019; Tsurui-Nishimura et al., 2013). To circumvent this lethality, we used a  
201 temperature sensitive Gal4 inhibitor, Gal80<sup>ts</sup>, to prevent *xrp1* expression throughout most of  
202 larval development. Shifting the larvae to the Gal80<sup>ts</sup> restrictive temperature 24 hours before  
203 dissection allowed for a relatively short burst of *xrp1* expression. Under these conditions,  
204 *xrp1* over-expressing compartments accumulated p62 (Figure 2a-b) and had higher levels of  
205 p-eIF2 $\alpha$  (Figure 2c-d) than the wild-type, control compartments. Therefore, Xrp1 is sufficient  
206 to induce proteotoxic stress. Furthermore, *xrp1* expression led to a strong increase in GstD1-  
207 GFP levels (Figure 2e-f), indicating that the oxidative stress response is also activated  
208 downstream of Xrp1. Overall, this data suggests that Xrp1 and Irbp18 are responsible for  
209 inducing proteotoxic stress and the oxidative stress response in *Rp/+* cells, which explains  
210 why their removal so effectively rescues Minute competition.

211

212 If Xrp1 and Irbp18 are required in competition because they induce proteotoxic stress, then  
213 inducing proteotoxic stress by other means should lead to the loser status in an Xrp1- and  
214 Irbp18- independent manner. To test this hypothesis, we induced proteotoxic stress by well-  
215 established means. eIF2 $\alpha$  is phosphorylated in response to proteotoxic stress, leading to  
216 global attenuation of translation (Cnop et al., 2017; Hetz, 2012). However, sustained increase  
217 in p-eIF2 $\alpha$  has also been shown to induce proteotoxic stress, by causing accumulation of  
218 aggregogenic stress granules (Baradaran-Heravi, Van Broeckhoven, & van der Zee, 2020;  
219 Ohno, 2014). Therefore, we sought to induce high levels of p-eIF2 $\alpha$ . Growth arrest and  
220 DNA-damage-inducible 34 (GADD34) is a Protein Phosphatase 1 (PP1) regulatory subunit,  
221 which causes p-eIF2 $\alpha$  dephosphorylation by providing PP1 with target specificity for p-eIF2 $\alpha$   
222 (Novoa, Zeng, Harding, & Ron, 2001). As expected, *GADD34-RNAi* increased the levels of  
223 p-eIF2 $\alpha$  (Figure S2a-b). *GADD34-RNAi* in the posterior compartment of wing discs also led  
224 to higher levels of p62 (Figure 3a-b) and of mono- and poly-ubiquitinated proteins (detected  
225 by the FK2 antibody) than in the control anterior compartment (Figure 3c-d). As these are  
226 both markers of protein aggregates (Nezis et al., 2008; Rubinsztein, 2006), these data indicate  
227 that sustained eIF2 $\alpha$  phosphorylation induces proteotoxic stress and protein aggregation.  
228 GADD34 knockdown also upregulated GstD1-GFP (Figure 3e-f) and p-JNK (Figure 3g and  
229 Figure S2c). Thus, increased levels of p-eIF2 $\alpha$  are sufficient to induce proteotoxic stress, the  
230 oxidative stress response, and JNK pathway

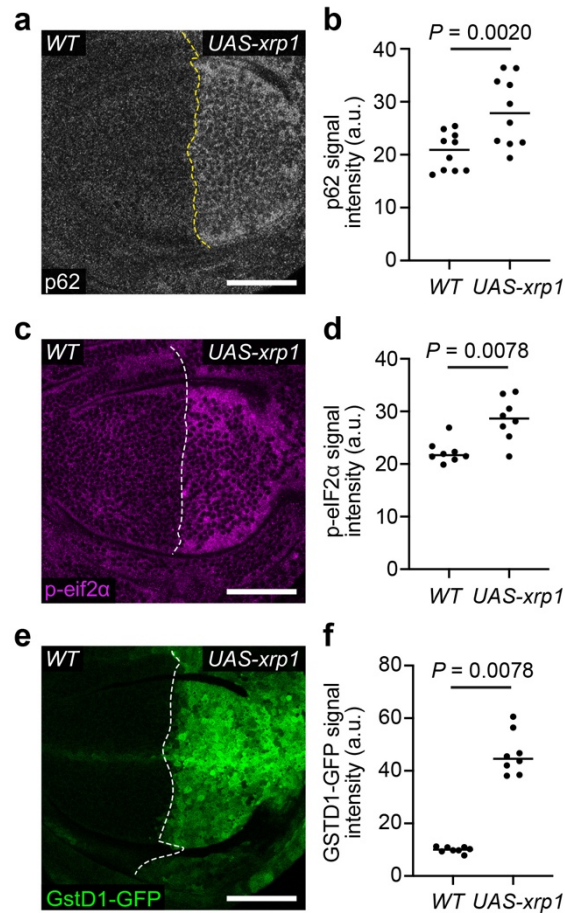

**Figure 2. Xrp1 is sufficient for proteotoxic stress and the oxidative stress response. (a-b)** A wild-type (WT) wing disc harboring GSTD1-GFP and over-expressing *xrp1* (*UAS-xrp1*) in the posterior compartment and immuno-stained for p62 (grey) (a) with quantification of p62 signal intensity (b) (n = 10; two-sided Wilcoxon signed-rank test). (c-d) A wing disc of the same genotype as in (a) immuno-stained for p-eIF2 $\alpha$  (magenta) (c) with quantification of p-eIF2 $\alpha$  signal intensity (d) (n = 8; two-sided Wilcoxon signed-rank test). (e-f) GSTD1-GFP reporter signal (green) (e) in a wing disc of the same genotype as in (a) with quantification of GSTD1-GFP signal intensity shown in (f) (n = 8; two-sided Wilcoxon signed-rank test).

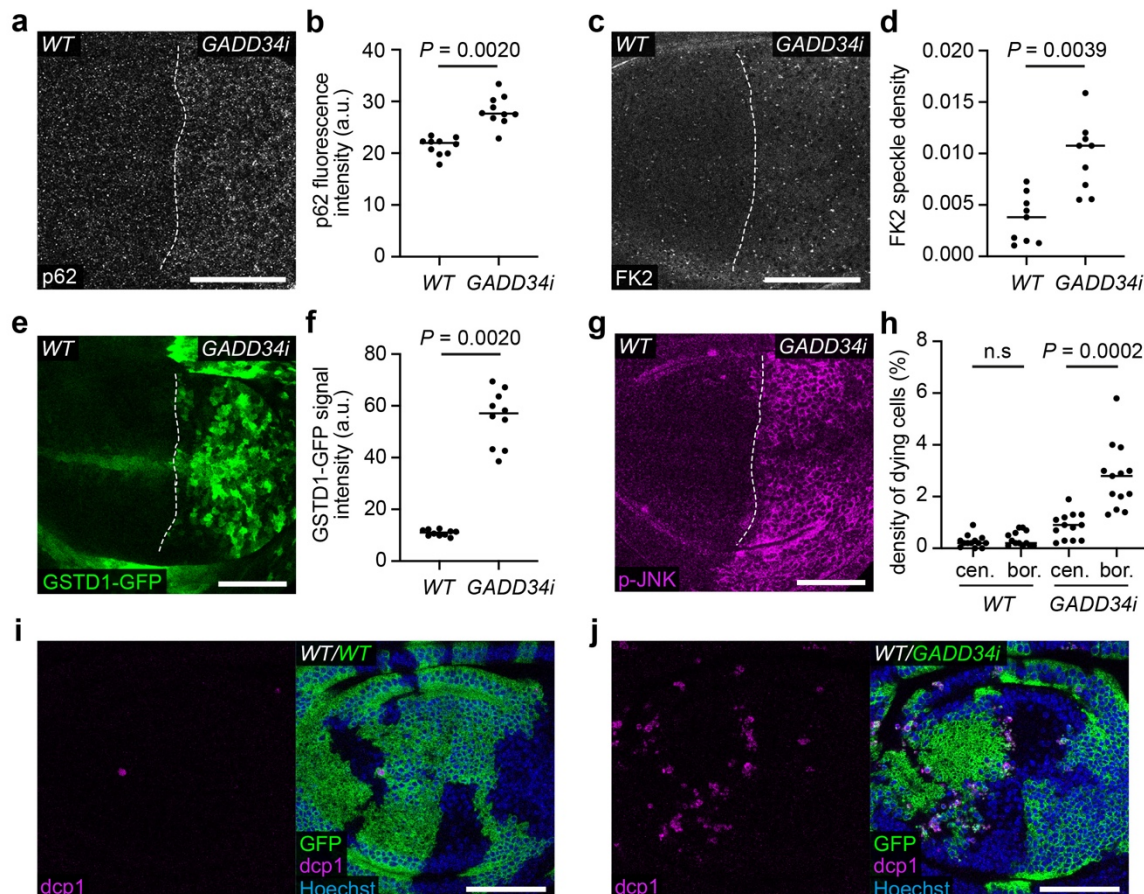

**Figure 3. GADD34 knockdown induces proteotoxic stress and the loser status.** (a-b) A wild-type (WT) wing disc carrying the GSTD1-GFP reporter and expressing *GADD34-RNAi* (*GADD34i*) in the posterior compartment, immuno-stained for p62 (grey) (a) with quantification of p62 fluorescence intensity (b) ( $n = 10$ ; two-sided Wilcoxon signed-rank test). (c-d) A wing disc of the same genotype as in (a), immuno-stained for FK2 (grey) to label mono- and poly-ubiquitinated proteins (c) with quantification of FK2 speckle density (d) ( $n = 9$ ; two-sided Wilcoxon signed-rank test). (e-f) GSTD1-GFP (green) in a wing disc of the same genotype as in (a), with quantification of GSTD1-GFP signal intensity (f) ( $n = 10$ ; two-sided Wilcoxon signed-rank test). (g-h) A wing disc of the same genotype as in (a), immuno-stained for p-JNK (magenta) (g). (h-j) Wing discs harboring either WT clones (GFP positive) (i) or *GADD34-RNAi* expressing clones (GFP positive) (j) immuno-stained for dcp1 (magenta), with quantification of density of dying cells at the center (cen.) and border (bor.) of clones as indicated (h) ( $n = 13$  and  $13$ , respectively; two-sided Wilcoxon signed-rank test). The clone border defines cells within two cell diameters of the clone perimeter.

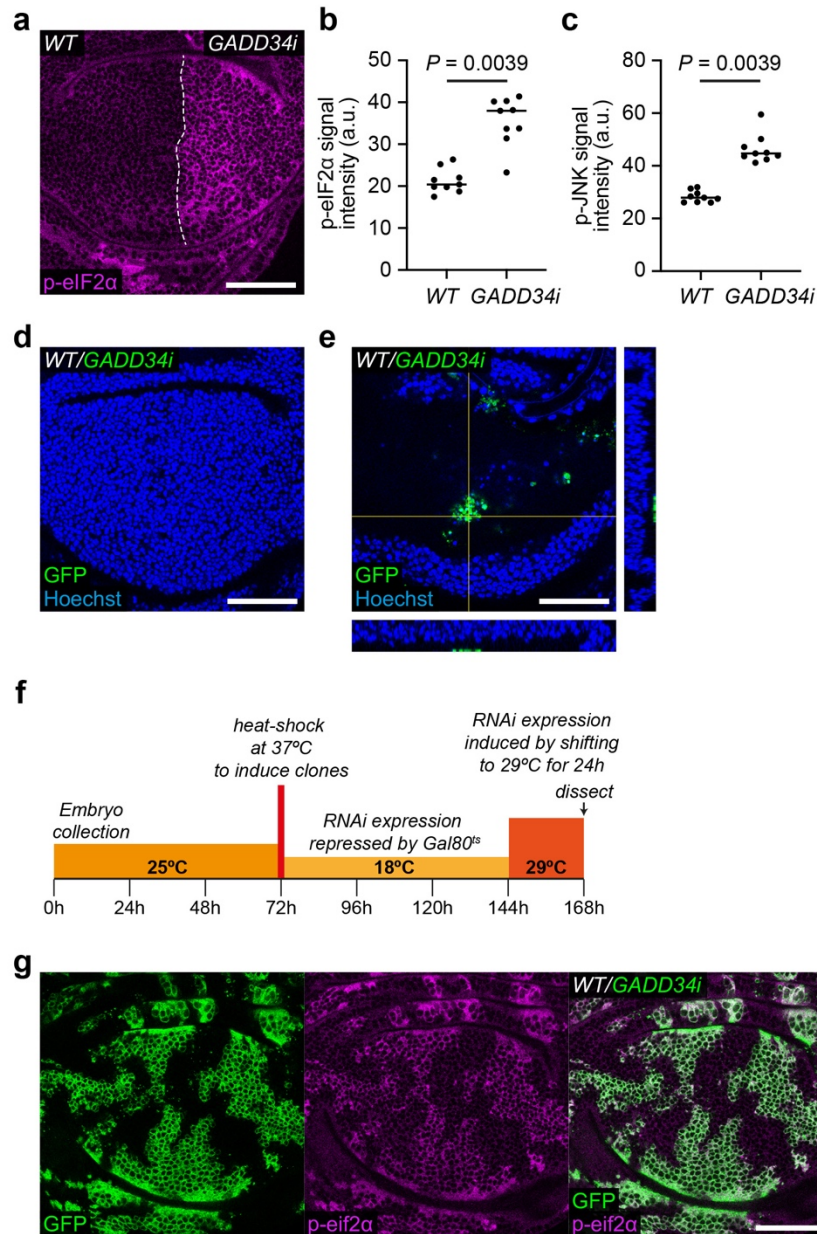

**Figure S2. GADD34 knockdown induces the loser status.** (a-b) A wing disc expressing *GADD34-RNAi* (*GADD34i*) in the posterior compartment and immuno-stained for p-eIF2 $\alpha$  (magenta) (a) with quantification of p-eIF2 $\alpha$  signal intensity (b) (n = 9; two-sided Wilcoxon signed-rank test). (c) Quantification of p-JNK signal intensity in wing discs expressing *GADD34-RNAi* in the posterior compartment (n = 9; two-sided Wilcoxon signed-rank test). (d) A wing disc harboring *GADD34-RNAi* expressing clones (GFP positive), generated in the absence of Gal80<sup>ts</sup>, with nuclei labelled in blue. (e) A basal section of a wing disc with *GADD34-RNAi* clones (GFP positive), generated in the absence of Gal80<sup>ts</sup>, with nuclei labelled in blue, to show that only small, basally extruded *GADD34-RNAi* expressing clones remain. Orthogonal views taken at the positions indicated by the yellow lines are shown to

the right and bottom of the main image. **(f)** Schematic depicting experimental conditions for generating large *GADD34-RNAi* expressing clones. **(g)** A wing disc with *GADD34-RNAi* expressing clones (GFP positive), generated with the experimental conditions depicted in **(f)**, immuno-stained for p-eIF2 $\alpha$  (magenta).

231 activity, all of which are observed in *Rp/+* prospective loser cells.

232

233 We then induced *GADD34-RNAi* in a mosaic fashion to test whether it induces the loser  
234 status. *GADD34-RNAi* expressing clones were efficiently removed from wing discs in mosaic  
235 experiments (Figure S2d). Only a few fragments of clones remained, and these had been  
236 basally extruded from the epithelium (Figure S2e), consistent with competitive elimination.  
237 However, it was also possible that this was due to cell-autonomous activation of apoptosis.  
238 Thus, we designed an experimental strategy to obtain large clones (Figure S2f) and directly  
239 compare the rate of apoptosis at clone borders and centers, as increased border death is a  
240 hallmark of cell competition (Baker, 2020; Li & Baker, 2007). We made use of Gal80<sup>ts</sup> for  
241 conditional expression and placed larvae at the Gal80<sup>ts</sup> permissive temperature after clone  
242 induction, to allow clones to expand without induction of transgene expression. We then  
243 induced *GADD34-RNAi* (and *GFP*) expression by moving larvae to the Gal80<sup>ts</sup> restrictive  
244 temperature 24 hours before dissection (Figure S2f). This short period of *GADD34-RNAi*  
245 expression was sufficient to increase p-eIF2 $\alpha$  (Figure S2g). Unlike control wild-type clones,  
246 *GADD34-RNAi* expressing clones had significantly higher levels of cell death at clone  
247 borders than in the center of clones, showing that they are subject to competitive elimination  
248 by wild-type cells (Figure 3h-j).

249

250 We next asked whether *GADD34-RNAi* induced cell elimination depends on Xrp1. As Xrp1  
251 and Irbp18 function upstream of proteotoxic stress in *Minutes* (Figure 1), we were surprised  
252 to find that co-expression of *xrp1-RNAi* with *GADD34-RNAi* resulted in a strong rescue of  
253 clone elimination (Figure 4a-c). Clones were readily recovered in every disc, suggesting that  
254 Xrp1 also functions downstream of proteotoxic stress. Formally, one possible explanation for  
255 this rescue could be the presence of a second UAS construct (*UAS-xrp1-RNAi*), which, by  
256 titrating Gal4, could weaken the expression of *UAS-GADD34-RNAi*. To rule out this  
257 possibility, the clones expressing *GADD34-RNAi* alone in this experiment also carried a  
258 second UAS construct: an inert UAS insertion on the second chromosome that doesn't drive  
259 expression of a transgene. All further experiments in this study that compare the phenotype of  
260 expression of a single UAS construct to that of two UAS constructs use this strategy. Thus,  
261 *GADD34-RNAi* clone elimination is mediated by Xrp1. Altogether, these data show that Xrp1  
262 functions both upstream and downstream of proteotoxic stress and suggest that a feed-  
263 forward loop between proteotoxic stress and Xrp1 drives *Rp/+* cells to become losers.



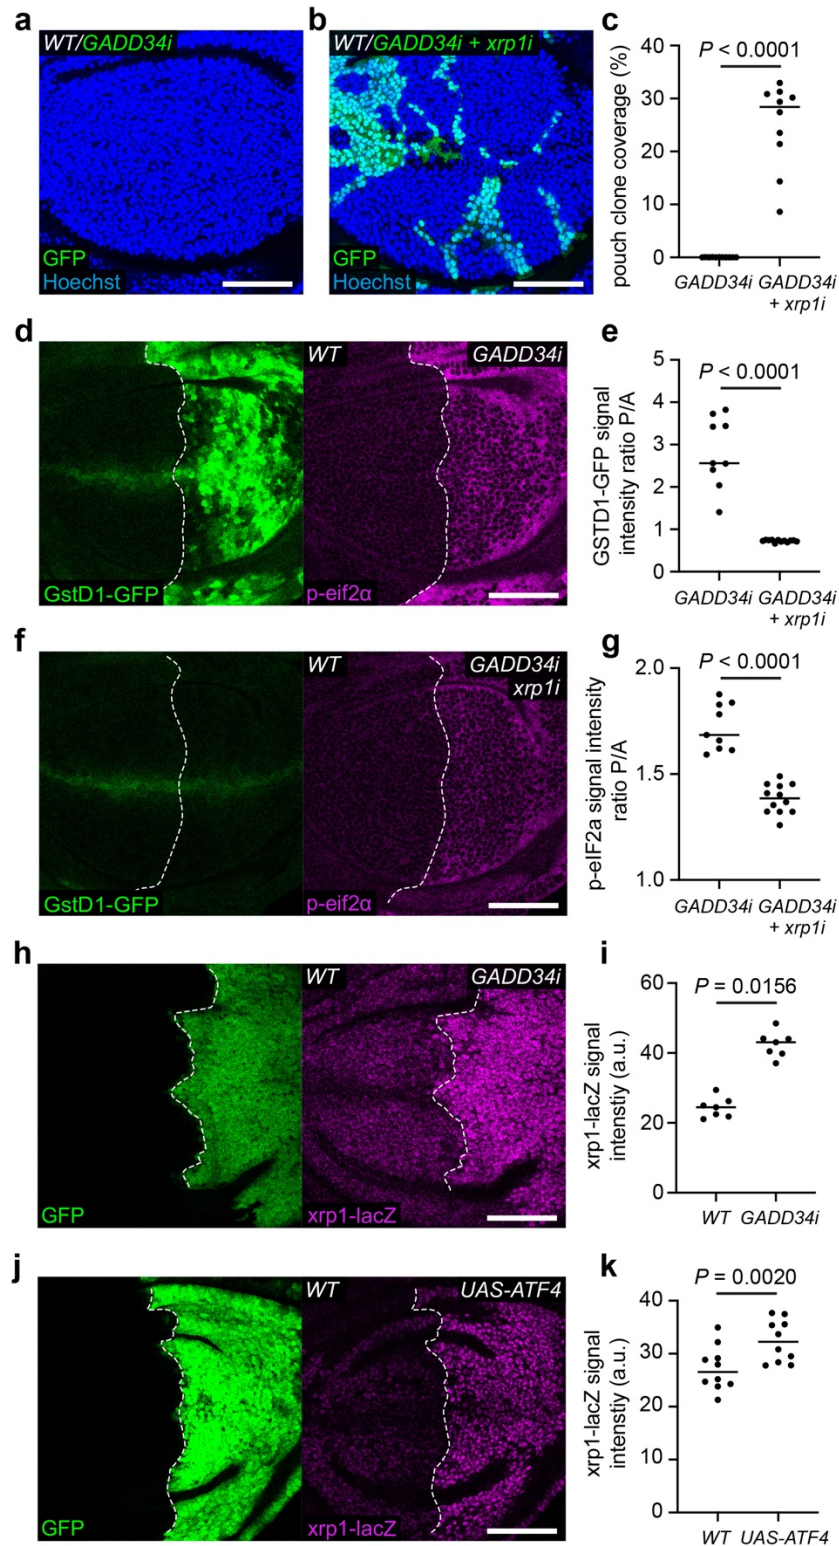

**Figure 4. A feed-forward loop between Xrp1 and proteotoxic stress.** (a-b) Wild-type wing discs harboring *GADD34-RNAi* (*GADD34i*) expressing clones (GFP positive) (a) or *GADD34-RNAi* and *xrp1-RNAi* (*xrp1i*) expressing clones (GFP positive) (b) with nuclei labelled in blue, and quantification of percentage clone coverage of the pouch (c) (n = 11 and

10, respectively; two-sided Mann–Whitney U-test). **(d-g)** Wing discs harboring GSTD1-GFP (green) and expressing either *GADD34-RNAi* **(d)** or *GADD34-RNAi* and *xrp1-RNAi* **(f)** in the posterior compartment, immuno-stained for p-eIF2 $\alpha$  (magenta), with quantification of the Posterior / Anterior (P/A) ratio of GSTD1-GFP signal intensity **(e)** (n = 9 and 12, respectively; two-sided Student's t-test) and the Posterior / Anterior (P/A) ratio of p-eIF2 $\alpha$  signal intensity **(g)** (n = 9 and 12, respectively; two-sided Student's t-test). **(h-i)** A wing disc carrying the *xrp1-lacZ* reporter and expressing *GADD34-RNAi* and *GFP* (green) in the posterior compartment, immuno-stained with anti- $\beta$ -galactosidase (magenta) **(h)**, with quantification of *xrp1-lacZ* signal intensity **(i)** (n = 7; two-sided Wilcoxon signed-rank test). **(j-k)** A wing disc carrying the *xrp1-lacZ* reporter and over-expressing *ATF4* (*UAS-ATF4*) and *GFP* (green) in the posterior compartment, immuno-stained with anti- $\beta$ -galactosidase (magenta) **(j)**, with quantification of *xrp1-lacZ* signal intensity **(k)** (n = 10; two-sided Wilcoxon signed-rank test).

264 Xrp1 knockdown completely rescued the increased GstD1-GFP observed in *GADD34-RNAi*  
265 expressing compartments, bringing levels down to, or even slightly lower than, wild-type  
266 levels (Figure 4d-f). Remarkably, Xrp1 knockdown was also able to partially rescue the  
267 increased p-eIF2 $\alpha$  in *GADD34-RNAi* expressing compartments (Figure 4d and f-g),  
268 suggesting that removing Xrp1 breaks the feed-forward loop to proteotoxic stress, and  
269 therefore partially rescues the increased p-eIF2 $\alpha$  in *GADD34-RNAi* expressing cells.

270

271 How might Xrp1 be acting downstream of proteotoxic stress? During ER stress, the UPR  
272 induces eIF2 $\alpha$  phosphorylation, which mediates global translation repression and selective  
273 translation of a subset of transcripts, including that of ATF4, which, in mammals, mediates  
274 expression of chaperones and proapoptotic genes, including *CHOP* (Cnop et al., 2017; Hetz,  
275 2012). Although no clear mammalian Xrp1 homologs exist, it has been suggested that Xrp1  
276 is the functional homolog of CHOP (Blanco et al., 2020), which heterodimerizes with  
277 CEBP $\gamma$ , the human homolog of *Irbp18* (Deppmann, Alvania, & Taparowsky, 2006).

278 Consistently, we found that *GADD34-RNAi* expressing compartments had significantly  
279 higher *xrp1-lacZ* signal than control compartments (Figure 4h-i). Furthermore, *ATF4* over-  
280 expressing compartments upregulated *xrp1-lacZ* (Figure 4j-k). These data therefore suggest  
281 that ATF4 mediates Xrp1 transcriptional activation in *GADD34-RNAi* and *Rp/+* cells,  
282 mirroring CHOP regulation by ATF4 during the UPR in mammals.

283

284 We have previously shown that proteotoxic stress induces expression of the Nrf2 reporter  
285 GstD1-GFP (Baumgartner et al., 2021) and that over-expression of *nrf2* is sufficient to turn  
286 otherwise wild-type cells into losers (Kucinski et al., 2017). Therefore, we investigated  
287 whether the contributions of Nrf2 and of Xrp1 to the loser status are functionally linked. In  
288 the absence of Gal80<sup>ts</sup>, *nrf2* expressing clones were readily eliminated from wing discs, with  
289 only a few tiny clones remaining at the time of dissection (Figure 5a and c). *xrp1-RNAi*  
290 significantly rescued the growth of *nrf2* expressing clones (Figure 5b-c), indicating that Xrp1  
291 functions downstream of Nrf2. *Irbp18* knockdown also rescued *nrf2* expressing clones from  
292 elimination (Figure 5d-f) confirming that Xrp1 functions along with *Irbp18*, downstream of  
293 Nrf2. This suggests that in *Rp/+* tissues, proteotoxic stress activates Xrp1 by two routes, one  
294 via the UPR and ATF4, and the other via Nrf2.

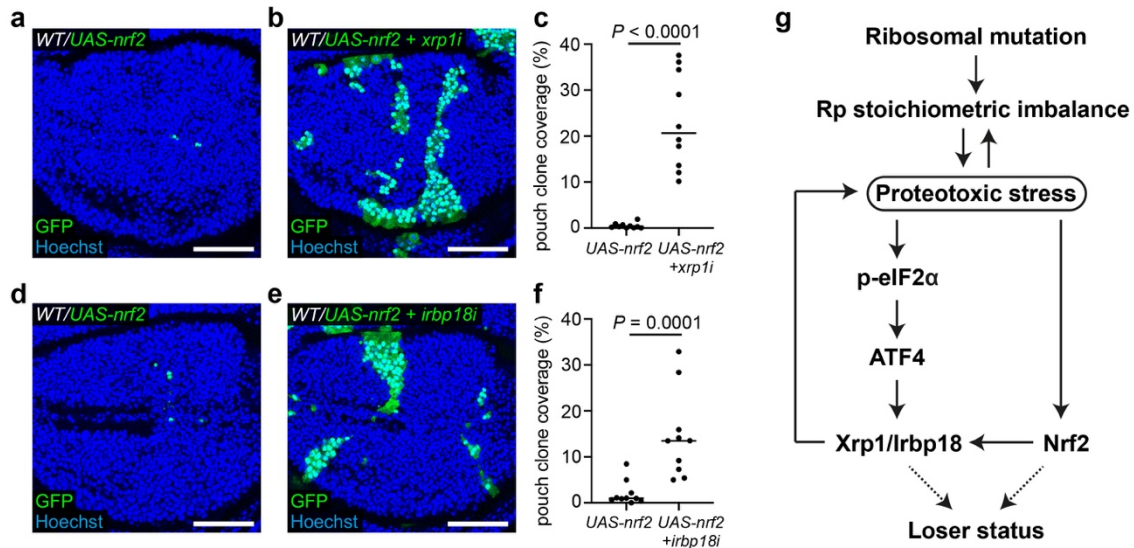

**Figure 5. Xrp1 and Irbp18 function downstream of Nrf2.** (a-c) Wild-type wing discs harboring *UAS-nrf2* expressing clones (GFP positive) (a) or *UAS-nrf2* and *xrp1-RNAi* (*xrp1i*) expressing clones (GFP positive) (b) with nuclei labelled in blue, and quantification of percentage clone coverage of the pouch (c) (n = 10 and 10, respectively; two-sided Mann–Whitney U-test). (d-f) Wild-type wing discs harboring *UAS-nrf2* expressing clones (GFP positive) (d) or *UAS-nrf2* and *irbp18-RNAi* (*irbp18i*) expressing clones (GFP positive) (e) with nuclei labelled in blue, and quantification of percentage clone coverage of the pouch (f) (n = 10 and 10, respectively; two-sided Mann–Whitney U-test). (g) Working model describing the role of the Xrp1-Irbp18 complex in *Rp/+* cells.

295

## Discussion

296

297 We have provided evidence for a feed-forward loop between proteotoxic stress and the  
298 Xrp1/Irbp18 complex, which is required for the elimination *Rp/+* cells in competing mosaic  
299 tissues (Figure 5g). Our data suggests that initial proteotoxic stress comes from an imbalance  
300 between SSU and LSU Ribosomal proteins. Proteotoxic stress in *Rp/+* cells induces Xrp1  
301 expression both downstream of p-eIF2 $\alpha$ , likely by the activity of ATF4, and possibly  
302 downstream of Nrf2. Xrp1 then acts, together with Irbp18, in a feed-forward loop, generating  
303 further proteotoxic stress. This causes LSU Rp's to accumulate, exacerbating the  
304 stoichiometric imbalance of Rp's in *Rp/+* cells. Knockdown of Xrp1 and Irbp18 can rescue  
305 proteotoxic stress and the oxidative stress response in *Rp/+* cells, suggesting that this feed-  
306 forward loop is essential for build-up of proteotoxic stress and to reduce the competitiveness  
307 of *Rp/+* cells.

308

309 If ATF4 is partly responsible for Xrp1 upregulation in *Rp/+* cells, then removal of ATF4  
310 would be expected to rescue Minute competition. However, the opposite effect has been  
311 observed, whereby *ATF4-RNAi* expressing clones generated in *Rp/+* discs are much smaller  
312 than control clones generated in *Rp/+* discs (Blanco et al., 2020), suggesting that ATF4  
313 worsens, rather than rescues, the loser status. On the basis of our data, we favour a model  
314 whereby ATF4 plays a dual role: it promotes Xrp1 expression in *Rp/+* cells, possibly along  
315 with Irbp18; however, it is also required for expression of chaperones, which help cells cope  
316 with proteotoxic stress (Cnop et al., 2017; Hetz, 2012), explaining why removal of ATF4  
317 worsens the loser status of *Rp/+* cells (Blanco et al., 2020). Of note, Nrf2 plays a similar dual  
318 role in *Minute* cell physiology; it contributes to the loser status, but is also cytoprotective in  
319 *Rp/+* cells (Kucinski et al., 2017), likely due to its ability to promote proteostasis (Baxter et  
320 al., 2021; Pajares, Cuadrado, & Rojo, 2017; Skibinski et al., 2017).

321

322 *CHOP* is one of several pro-apoptotic genes activated by the UPR to ensure that cells with  
323 extensive ER damage are eliminated (Cnop et al., 2017; Hetz, 2012; Hu, Tian, Ding, & Yu,  
324 2018). *xrp1* expression is induced downstream of p-eIF2 $\alpha$  and is required for the elimination  
325 of cells with high levels of p-eIF2 $\alpha$  (Figure 4). Furthermore, Xrp1 overexpression induces  
326 high levels of cell death (Blanco et al., 2020; Tsurui-Nishimura et al., 2013), suggesting that,  
327 like CHOP, Xrp1 has a proapoptotic role in cells experiencing ER stress, which is consistent

328 with the previously suggested notion that Xrp1 is functionally equivalent to CHOP (Blanco et  
329 al., 2020).

330

331 Ribosomopathies are a diverse class of human genetic disorders, resulting from either  
332 mutation of one copy of a Rp encoding gene or from defects in ribosome biogenesis (Mills &  
333 Green, 2017). A mutation equivalent to that of a ribosomopathy patient (*RpS23<sup>R67K</sup>*) was  
334 engineered in *Drosophila*, where it causes increased cell death and proteotoxic stress.

335 Knockdown of Xrp1 rescues autonomous cell death in *RpS23<sup>R67K/+</sup>* cells (Recasens-Alvarez  
336 et al., 2021). Our work suggests that proteotoxic stress in *RpS23<sup>R67K/+</sup>* cells would also be  
337 rescued by removal of Xrp1 and, by extension, that CHOP, or regulators of CHOP, could be  
338 promising drug targets for therapeutics for ribosomopathies.

339

340 Nrf2 plays a pro-survival role in many contexts, by activating a battery of genes that enable  
341 the metabolic adaptation to oxidative stress (Ma, 2013). It is therefore counterintuitive that  
342 Nrf2 overexpression should induce the loser status and, at high expression levels, cell death  
343 (Kucinski et al., 2017). Our work suggests that the toxicity of Nrf2 is at least in part due to  
344 Xrp1 function as elimination of Nrf2 expressing cells is rescued by Xrp1 knockdown.

345 Whether additional Nrf2 target genes contribute to the loser status remains to be established.

346

### 347 Acknowledgments

348

349 We thank members of the Piddini lab for helpful discussions on the project. We thank the  
350 Wolfson Bioimaging Facility for access to microscopes and the University of Bristol  
351 Proteomics Facility for performing the TMT proteomic experiments and for bioinformatics  
352 support. This work was supported a Cancer Research UK Programme Foundation Award to  
353 E.P. (Grant C38607/A26831) and a Wellcome Trust Senior Research Fellowship to E.P.  
354 (205010/Z/, 16/Z).

355

356 **Author contributions:** E.P led the project. All authors conceived of the experiments. P.F.L  
357 performed and analysed the majority of the experiments with contributions from M.E.B and  
358 R.L. P.F.L and E.P wrote the manuscript with feedback from M.E.B and R.L.

359

360 **Financial and non-financial competing interests:** The authors declare no competing  
361 interests.

362

363 **Materials & correspondence:** The Lead Contacts, Professor Eugenia Piddini  
364 ([eugenia.piddini@bristol.ac.uk](mailto:eugenia.piddini@bristol.ac.uk)) and Dr Paul F. Langton ([paul.langton@bristol.ac.uk](mailto:paul.langton@bristol.ac.uk)) will  
365 fulfil requests for resources and reagents.

366

367 **Data availability:** All source numerical data are provided in the Statistics Source Data table.  
368 All other data used in this paper are available upon reasonable request.

369

## 370 Methods

371

372 **Fly husbandry.** Fly food composition is: 7.5g/L agar powder, 50g/L baker's yeast, 55g/L  
373 glucose, 35g/L wheat flour, 2.5 % nipagin, 0.4 % propionic acid and 1.0%  
374 penicillin/streptomycin. Eggs were collected for 24 hours in a 25°C incubator and  
375 experimental crosses were maintained in either an 18°C incubator, a 25°C incubator, or in a  
376 water bath set to a specific temperature as indicated in the genotypes table below. Wing discs  
377 were dissected from wandering third instar larvae. For all datasets, egg collections, heat  
378 shocks, temperature shifts, dissections, and imaging were done in parallel for control and  
379 experimental crosses. For mosaic competition experiments, all dissected larvae were of the  
380 same sex for both the control and experimental crosses. For half-half experiments, where the  
381 anterior compartment and posterior compartment were compared, sexes were not  
382 differentiated.

383

384 **Immunostaining.** Wandering third instar larvae were dissected in phosphate buffered saline  
385 (PBS) and hemi-larvae were fixed in 4% paraformaldehyde for 20 minutes at room  
386 temperature. Tissues were permeabilized with three 10-minute washes in PBST (0.25% triton  
387 in PBS) and blocked for 20 minutes in blocking buffer (4% fetal calf serum in PBST).  
388 Samples were incubated with primary antibodies diluted in blocking buffer at the  
389 concentration indicated in the key resources table overnight at 4°C. Samples were washed  
390 three times in PBST for 10 minutes and incubated with secondary antibodies and Hoechst  
391 diluted in blocking buffer at the concentration indicated in the key resources table for 45-  
392 minutes at room temperature. After a further three 10-minute washes in PBST, wing discs

393 were dissected from hemi-larvae and mounted in Vectashield (Vector laboratories) on  
394 borosilicate glass sides (no 1.5, VWR international).

395

396 **Clonal analysis and temperature shifts.** Mosaic wing discs were generated with the hs-FLP  
397 transgenic line by heat shocking crosses three days after egg laying in a 37°C water bath for  
398 the time indicated in the genotypes table below. For experiments using temperature sensitive  
399 Gal80 (Gal80<sup>ts</sup>) to control the timing and level of transgene expression, conditions were  
400 optimized for each experiment and crosses were incubated in either an incubator or water  
401 bath set to the temperatures indicated in the genotypes table below.

### Genotypes Table

| Figure number/panel                                  | Genotype                                                                            | Experimental conditions                                           |
|------------------------------------------------------|-------------------------------------------------------------------------------------|-------------------------------------------------------------------|
| Main figures                                         |                                                                                     |                                                                   |
| 1a                                                   | <i>GstD1-GFP/UAS-xrp1-RNAi; FRT82B, RpS3[Plac92], hh-Gal4/+</i>                     | 25°C                                                              |
| 1d                                                   | <i>GstD1-GFP/UAS-irbp18-RNAi; FRT82B, RpS3[Plac92], hh-Gal4/+</i>                   | 25°C                                                              |
| 1g                                                   | <i>GstD1-GFP/UAS-xrp1-RNAi; FRT82B, RpS3[Plac92], hh-Gal4/+</i>                     | 25°C                                                              |
| 1i                                                   | <i>GstD1-GFP/UAS-irbp18-RNAi; FRT82B, RpS3[Plac92], hh-Gal4/+</i>                   | 25°C                                                              |
| 1l (control)                                         | <i>yw</i>                                                                           | 25°C                                                              |
| 1l ( <i>RpS3<sup>+/-</sup></i> )                     | <i>FRT82B, RpS3[Plac92]/+</i>                                                       | 25°C                                                              |
| 1l ( <i>RpS3<sup>+/-</sup>, xrp1<sup>+/-</sup></i> ) | <i>FRT82B, xrp1[m273], RpS3[Plac92]/+</i>                                           | 25°C                                                              |
| 2a                                                   | <i>tub-Gal80[ts]/+; UAS-xrp1/en-Gal4, GstD1-GFP</i>                                 | 18°C for 8-9 days, 27°C for 24h                                   |
| 2c                                                   | <i>tub-Gal80[ts]/+; UAS-xrp1/en-Gal4, GstD1-GFP</i>                                 | 18°C for 8-9 days, 27°C for 24h                                   |
| 2e                                                   | <i>tub-Gal80[ts]/+; UAS-xrp1/en-Gal4, GstD1-GFP</i>                                 | 18°C for 8-9 days, 27°C for 24h                                   |
| 3a                                                   | <i>en-Gal4, GstD1-GFP/+; UAS-GADD34-RNAi/+</i>                                      | 25°C                                                              |
| 3c                                                   | <i>en-Gal4, GstD1-GFP/+; UAS-GADD34-RNAi/+</i>                                      | 25°C                                                              |
| 3e                                                   | <i>en-Gal4, GstD1-GFP/+; UAS-GADD34-RNAi/+</i>                                      | 25°C                                                              |
| 3g                                                   | <i>en-Gal4, GstD1-GFP/+; UAS-GADD34-RNAi/+</i>                                      | 25°C                                                              |
| 3i                                                   | <i>hs-FLP/+; tub&gt;CD2&gt;Gal4, UAS-CD8-GFP/+; tub-Gal80[ts] / +</i>               | 25°C for 3 days, 35 min heat shock, 18°C for 3 days, 29°C for 24h |
| 3j                                                   | <i>hs-FLP/+; tub&gt;CD2&gt;Gal4, UAS-CD8-GFP/+; tub-Gal80[ts] / UAS-GADD34-RNAi</i> | 25°C for 3 days, 35 min heat shock, 18°C for 3 days, 29°C for 24h |
| 4a                                                   | <i>hs-FLP/+; VDRC[60101]/+; act&gt;CD2&gt;Gal4, UAS-GFP/UAS-GADD34-RNAi</i>         | 25°C for 3 days, 20 min heat shock, 25°C for 3 days               |



|                              |                                                                                               |                                                                      |
|------------------------------|-----------------------------------------------------------------------------------------------|----------------------------------------------------------------------|
| 4b                           | <i>hs-FLP/+; UAS-xrp1-RNAi/+; act&gt;CD2&gt;Gal4, UAS-GFP/UAS-GADD34-RNAi</i>                 | 25°C for 3 days, 20 min heat shock,<br>25°C for 3 days               |
| 4d                           | <i>en-Gal4, GstD1-GFP/ VDRC[60101]; UAS-GADD34-RNAi/+</i>                                     | 25°C                                                                 |
| 4f                           | <i>en-Gal4, GstD1-GFP/ UAS-xrp1-RNAi; UAS-GADD34-RNAi/+</i>                                   | 25°C                                                                 |
| 4h                           | <i>en-Gal4, UAS-GFP/+; FRT82B, xrp1-lacZ/UAS-GADD34-RNAi</i>                                  | 25°C                                                                 |
| 4j                           | <i>tub-Gal80[ts]/+; en-Gal4, GstD1-GFP/+; FRT82B, xrp1-lacZ/UAS-ATF4</i>                      | 18°C for 8-9 days, 29°C for 24h                                      |
| 5a                           | <i>hs-FLP/+; VDRC[60101]/+; act&gt;CD2&gt;Gal4, UAS-GFP/UAS-nrf2</i>                          | 25°C for 3 days, 20 min heat shock,<br>25°C for 3 days               |
| 5b                           | <i>hs-FLP/+; UAS-xrp1-RNAi/+; act&gt;CD2&gt;Gal4, UAS-GFP/UAS-nrf2</i>                        | 25°C for 3 days, 20 min heat shock,<br>25°C for 3 days               |
| 5d                           | <i>hs-FLP/+; VDRC[60101]/+; act&gt;CD2&gt;Gal4, UAS-GFP/UAS-nrf2</i>                          | 25°C for 3 days, 20 min heat shock,<br>25°C for 3 days               |
| 5e                           | <i>hs-FLP/+; UAS-irbp18-RNAi/+; act&gt;CD2&gt;Gal4, UAS-GFP/UAS-nrf2</i>                      | 25°C for 3 days, 20 min heat shock,<br>25°C for 3 days               |
| <b>Supplementary figures</b> |                                                                                               |                                                                      |
| Figure S1a                   | <i>en-Gal4, UAS-GFP/ UAS-xrp1-RNAi; FRT82B, xrp1-lacZ/+</i>                                   | 25°C                                                                 |
| Figure S1c                   | <i>en-Gal4, UAS-GFP/ UAS-irbp18-RNAi; FRT82B, xrp1-lacZ/+</i>                                 | 25°C                                                                 |
| Figure S1e                   | <i>hs-FLP, UAS-CD8-GFP/+; VDRC[60101]/+; FRT82B, RpS3[Plac92], act&gt;RpS3&gt;Gal4/+</i>      | 25°C for 3 days, 25 min heat shock,<br>25°C for 3 days               |
| Figure S1f                   | <i>hs-FLP, UAS-CD8-GFP/+; UAS-xrp1-RNAi /+; FRT82B, RpS3[Plac92], act&gt;RpS3&gt;Gal4/+</i>   | 25°C for 3 days, 25 min heat shock,<br>25°C for 3 days               |
| Figure S1h                   | <i>hs-FLP, UAS-CD8-GFP/+; VDRC[60100]/+; FRT82B, RpS3[Plac92], act&gt;RpS3&gt;Gal4/+</i>      | 25°C for 3 days, 25 min heat shock,<br>25°C for 3 days               |
| Figure S1i                   | <i>hs-FLP, UAS-CD8-GFP/+; UAS-irbp18-RNAi /+; FRT82B, RpS3[Plac92], act&gt;RpS3&gt;Gal4/+</i> | 25°C for 3 days, 25 min heat shock,<br>25°C for 3 days               |
| Figure S1k                   | <i>hs-FLP; VDRC[60101]/+; act&gt;CD2&gt;Gal4, UAS-GFP/UAS-mahj-RNAi</i>                       | 25°C for 3 days, 20 min heat shock,<br>25°C for 3 days               |
| Figure S1l                   | <i>hs-FLP; UAS-xrp1-RNAi/+; act&gt;CD2&gt;Gal4, UAS-GFP/UAS-mahj-RNAi</i>                     | 25°C for 3 days, 20 min heat shock,<br>25°C for 3 days               |
| Figure S2a                   | <i>en-Gal4, GstD1-GFP/+; UAS-GADD34-RNAi/+</i>                                                | 25°C                                                                 |
| Figure S2d                   | <i>hs-FLP/+; VDRC[60101]/+; act&gt;CD2&gt;Gal4, UAS-GFP/UAS-GADD34-RNAi</i>                   | 25°C for 3 days, 20 min heat shock,<br>25°C for 3 days               |
| Figure S2e                   | <i>hs-FLP/+; VDRC[60101]/+; act&gt;CD2&gt;Gal4, UAS-GFP/UAS-GADD34-RNAi</i>                   | 25°C for 3 days, 20 min heat shock,<br>25°C for 3 days               |
| Figure S2g                   | <i>hs-FLP/+; tub&gt;CD2&gt;Gal4, UAS-CD8-GFP/+; tub-Gal80[ts] / UAS-GADD34-RNAi</i>           | 25°C for 3 days, 35 min heat shock,<br>18°C for 3 days, 29°C for 24h |

402 **Proteomics.** Sample preparation and Tandem Mass Tag (TMT) mass spectrometry were  
403 performed as described in (Baumgartner et al., 2021).

404

405 **Image acquisition and processing.** Images were acquired using a Leica SP8 confocal  
406 microscope with a 40x 1.3 NA P Apo Oil objective. Wing discs were imaged as z-stacks with

407 each section corresponding to 1  $\mu$ m. Images were processed using Photoshop (Adobe  
408 Photoshop 2020) and Fiji (Version 2).

409

410 **Quantifications.** Clonal areas, cell death quantifications and fluorescence intensity  
411 quantifications were carried out using custom built Fiji scripts. All analysis focused on the  
412 pouch region of the wing disc. For clone area measurements, the percentage of the volume of  
413 the pouch occupied by clones was determined. For cell death quantifications the clone border  
414 is defined as any cell within a 2 cell-range of the clone boundary. Cell death measurements  
415 were normalized to the respective area of the clone border or clone center as measured in Fiji.  
416 For all scatter plots the horizontal line represents the median.

417

418 **Statistics and reproducibility.** All data represented by the scatter plots including details of  
419 the specific statistical test used for each experiment are shown in the Statistics Source Data  
420 table. Statistics were performed using GraphPad Prism (Prism 8). Univariate statistics were  
421 used to determine P-values. Parametric tests were used where assumptions of normality were  
422 met, otherwise non-parametric tests were used. The parametric test used was the Student's T-  
423 Test and the non-parametric tests used were the Mann Whitney U-test for non-paired data,  
424 and the Wilcoxon matched-pairs signed rank test for paired data. P-value corrections for  
425 multiple comparisons were not considered due to the low number of comparisons. For  
426 experiments comparing across wing discs a minimum of three biological repeats were  
427 performed. For experiments with an internal control, a minimum of two biological repeats  
428 were performed. Experiments performed to validate reagents (e.g., testing efficacy of RNAi  
429 lines) were carried out at least once.

### Key Resources Table

| Antibodies                          |                                               |                     |
|-------------------------------------|-----------------------------------------------|---------------------|
| Rabbit anti-p-eIF2 $\alpha$ (1:500) | Cell signalling                               | Cat#3398T           |
| Rabbit anti-Dcp1 (1:2000)           | Cell signalling                               | Cat#9578S           |
| Rabbit anti-Ref(2)P (1:5000)        | Tor Erik Rusten<br>(Katheder et al.,<br>2017) | N/A                 |
| Mouse anti-FK2 (1:1000)             | Enzo Life Sciences                            | Cat#ENZ-ABS840-0100 |

|                                                                                         |                            |            |
|-----------------------------------------------------------------------------------------|----------------------------|------------|
| Rabbit anti-pJNK pTPpY (1:500)                                                          | Promega                    | Cat#V793B  |
| Mouse anti-beta-galactosidase (1:500)                                                   | Promega                    | Cat#Z3781  |
| Donkey anti-Rabbit IgG Alexa Fluor 555 (1:500)                                          | Thermo scientific          | Cat#A31572 |
| Donkey anti-Mouse IgG Alexa Fluor 555 (1:500)                                           | Thermo scientific          | Cat#A31570 |
| Hoechst 33342 solution (1:5000)                                                         | Thermo scientific          | Cat#62249  |
| <i>Drosophila</i> strains                                                               |                            |            |
| <i>Drosophila RpS3[Plac92]</i>                                                          | Bloomington                | Cat#5627   |
| <i>Drosophila hh-Gal4/TM6b</i>                                                          | Jean-Paul Vincent          | N/A        |
| <i>Drosophila UAS-xrp1-RNAi<sup>KK104477</sup></i>                                      | VDRC                       | Cat#104477 |
| <i>Drosophila GstD1-GFP</i>                                                             | (Sykiotis & Bohmann, 2008) | N/A        |
| <i>Drosophila UAS-irbp18-RNAi<sup>KK110056</sup></i>                                    | VDRC                       | Cat#110056 |
| <i>Drosophila yw</i>                                                                    | Daniel St. Johnston        | N/A        |
| <i>Drosophila FRT82B, xrp1[M273]</i>                                                    | Nicholas Baker             | N/A        |
| <i>Drosophila tub-Gal80<sup>ts</sup></i>                                                | Jean-Paul Vincent          | N/A        |
| <i>Drosophila UAS-xrp1<sup>long</sup></i>                                               | Shoichiro Kurata           | N/A        |
| <i>Drosophila en-Gal4</i>                                                               | Piddini lab stocks         | N/A        |
| <i>Drosophila UAS-GADD34-RNAi</i>                                                       | Bloomington                | Cat#33011  |
| <i>Drosophila w<sup>+/w-</sup>; tub&gt;CD2&gt;Gal4, UAS-GFP; tub-Gal80<sup>TS</sup></i> | Bruce Edgar                | N/A        |
| <i>Drosophila en-Gal4, UAS-GFP</i>                                                      | Piddini lab stocks         | N/A        |
| <i>Drosophila FRT82B, xrp1<sup>02515</sup> (xrp1-lacZ)</i>                              | Nicholas Baker             | N/A        |
| <i>Drosophila UAS-ATF4-HA</i>                                                           | Bloomington                | Cat#81655  |
| <i>Drosophila hs-FLP<sup>122</sup>; act&gt;CD2&gt;Gal4, UAS-GFP/TM6b</i>                | Bruce Edgar                | N/A        |
| <i>Drosophila UAS<sup>60101</sup> ('Blank' UAS)</i>                                     | VDRC                       | Cat#60101  |
| <i>Drosophila UAS-nrf2</i>                                                              | (Sykiotis & Bohmann, 2008) | N/A        |

|                                                                                        |                            |           |
|----------------------------------------------------------------------------------------|----------------------------|-----------|
| <i>Drosophila hs-FLP, UAS-CD8-GFP;; FRT82B, RpS3[Plac92], act&gt;RpS3&gt;Gal4/TM6b</i> | (Baumgartner et al., 2021) | N/A       |
| <i>Drosophila UAS<sup>60100</sup> (empty attP)</i>                                     | VDRC                       | Cat#60100 |
| <i>Drosophila UAS-mahj RNAi</i>                                                        | Bloomington                | Cat#34912 |

430

## References

431

- 432 Akai, N., Ohsawa, S., Sando, Y., & Igaki, T. (2021). Epithelial cell-turnover ensures robust  
433 coordination of tissue growth in *Drosophila* ribosomal protein mutants. *PLoS Genet*,  
434 *17*(1), e1009300. doi:10.1371/journal.pgen.1009300
- 435 Amoyel, M., & Bach, E. A. (2014). Cell competition: how to eliminate your neighbours.  
436 *Development*, *141*(5), 988-1000. doi:10.1242/dev.079129
- 437 Baillon, L., & Basler, K. (2014). Reflections on cell competition. *Semin Cell Dev Biol*, *32*, 137-  
438 144. doi:10.1016/j.semcdb.2014.04.034
- 439 Baillon, L., Germani, F., Rockel, C., Hilchenbach, J., & Basler, K. (2018). Xrp1 is a transcription  
440 factor required for cell competition-driven elimination of loser cells. *Sci Rep*, *8*(1),  
441 17712. doi:10.1038/s41598-018-36277-4
- 442 Baker, N. E. (2011). Cell competition. *Curr Biol*, *21*(1), R11-15. doi:10.1016/j.cub.2010.11.030
- 443 Baker, N. E. (2017). Mechanisms of cell competition emerging from *Drosophila* studies. *Curr*  
444 *Opin Cell Biol*, *48*, 40-46. doi:10.1016/j.ceb.2017.05.002
- 445 Baker, N. E. (2020). Emerging mechanisms of cell competition. *Nat Rev Genet*, *21*(11), 683-  
446 697. doi:10.1038/s41576-020-0262-8
- 447 Baradaran-Heravi, Y., Van Broeckhoven, C., & van der Zee, J. (2020). Stress granule mediated  
448 protein aggregation and underlying gene defects in the FTD-ALS spectrum. *Neurobiol*  
449 *Dis*, *134*, 104639. doi:10.1016/j.nbd.2019.104639
- 450 Baumgartner, M. E., Dinan, M. P., Langton, P. F., Kucinski, I., & Piddini, E. (2021). Proteotoxic  
451 stress is a driver of the loser status and cell competition. *Nat Cell Biol*.  
452 doi:10.1038/s41556-020-00627-0
- 453 Baxter, P. S., Markus, N. M., Dando, O., He, X., Al-Mubarak, B. R., Qiu, J., & Hardingham, G.  
454 E. (2021). Targeted de-repression of neuronal Nrf2 inhibits alpha-synuclein  
455 accumulation. *Cell Death Dis*, *12*(2), 218. doi:10.1038/s41419-021-03507-z
- 456 Blanco, J., Cooper, J. C., & Baker, N. E. (2020). Roles of C/EBP class bZip proteins in the  
457 growth and cell competition of Rp ('Minute') mutants in *Drosophila*. *Elife*, *9*.  
458 doi:10.7554/eLife.50535
- 459 Boulan, L., Andersen, D., Colombani, J., Boone, E., & Leopold, P. (2019). Inter-Organ Growth  
460 Coordination Is Mediated by the Xrp1-Dilp8 Axis in *Drosophila*. *Dev Cell*, *49*(5), 811-  
461 818 e814. doi:10.1016/j.devcel.2019.03.016
- 462 Cnop, M., Toivonen, S., Igoillo-Esteve, M., & Salpea, P. (2017). Endoplasmic reticulum stress  
463 and eIF2alpha phosphorylation: The Achilles heel of pancreatic beta cells. *Mol*  
464 *Metab*, *6*(9), 1024-1039. doi:10.1016/j.molmet.2017.06.001

- 465 Coelho, C. M., Kolevski, B., Bunn, C., Walker, C., Dahanukar, A., & Leever, S. J. (2005).  
466 Growth and cell survival are unevenly impaired in pixie mutant wing discs.  
467 *Development*, 132(24), 5411-5424. doi:10.1242/dev.02148
- 468 Deppmann, C. D., Alvania, R. S., & Taparowsky, E. J. (2006). Cross-species annotation of  
469 basic leucine zipper factor interactions: Insight into the evolution of closed  
470 interaction networks. *Mol Biol Evol*, 23(8), 1480-1492. doi:10.1093/molbev/msl022
- 471 Francis, M. J., Roche, S., Cho, M. J., Beall, E., Min, B., Panganiban, R. P., & Rio, D. C. (2016).  
472 Drosophila IRBP bZIP heterodimer binds P-element DNA and affects hybrid  
473 dysgenesis. *Proc Natl Acad Sci U S A*, 113(46), 13003-13008.  
474 doi:10.1073/pnas.1613508113
- 475 Hetz, C. (2012). The unfolded protein response: controlling cell fate decisions under ER  
476 stress and beyond. *Nat Rev Mol Cell Biol*, 13(2), 89-102. doi:10.1038/nrm3270
- 477 Hu, H., Tian, M., Ding, C., & Yu, S. (2018). The C/EBP Homologous Protein (CHOP)  
478 Transcription Factor Functions in Endoplasmic Reticulum Stress-Induced Apoptosis  
479 and Microbial Infection. *Front Immunol*, 9, 3083. doi:10.3389/fimmu.2018.03083
- 480 Kale, A., Ji, Z., Kiparaki, M., Blanco, J., Rimesso, G., Flibotte, S., & Baker, N. E. (2018).  
481 Ribosomal Protein S12e Has a Distinct Function in Cell Competition. *Dev Cell*, 44(1),  
482 42-55 e44. doi:10.1016/j.devcel.2017.12.007
- 483 Katheder, N. S., Khezri, R., O'Farrell, F., Schultz, S. W., Jain, A., Rahman, M. M., . . . Rusten, T.  
484 E. (2017). Microenvironmental autophagy promotes tumour growth. *Nature*,  
485 541(7637), 417-420. doi:10.1038/nature20815
- 486 Kucinski, I., Dinan, M., Kolahgar, G., & Piddini, E. (2017). Chronic activation of JNK JAK/STAT  
487 and oxidative stress signalling causes the loser cell status. *Nat Commun*, 8(1), 136.  
488 doi:10.1038/s41467-017-00145-y
- 489 Lee, C. H., Kiparaki, M., Blanco, J., Folgado, V., Ji, Z., Kumar, A., . . . Baker, N. E. (2018). A  
490 Regulatory Response to Ribosomal Protein Mutations Controls Translation, Growth,  
491 and Cell Competition. *Dev Cell*, 46(4), 456-469 e454.  
492 doi:10.1016/j.devcel.2018.07.003
- 493 Li, W., & Baker, N. E. (2007). Engulfment is required for cell competition. *Cell*, 129(6), 1215-  
494 1225. doi:10.1016/j.cell.2007.03.054
- 495 Ma, Q. (2013). Role of nrf2 in oxidative stress and toxicity. *Annu Rev Pharmacol Toxicol*, 53,  
496 401-426. doi:10.1146/annurev-pharmtox-011112-140320
- 497 Maruyama, T., & Fujita, Y. (2017). Cell competition in mammals - novel homeostatic  
498 machinery for embryonic development and cancer prevention. *Curr Opin Cell Biol*,  
499 48, 106-112. doi:10.1016/j.ceb.2017.06.007
- 500 Marygold, S. J., Roote, J., Reuter, G., Lambertsson, A., Ashburner, M., Millburn, G. H., . . .  
501 Cook, K. R. (2007). The ribosomal protein genes and Minute loci of *Drosophila*  
502 *melanogaster*. *Genome Biol*, 8(10), R216. doi:10.1186/gb-2007-8-10-r216
- 503 Mauvezin, C., Ayala, C., Braden, C. R., Kim, J., & Neufeld, T. P. (2014). Assays to monitor  
504 autophagy in *Drosophila*. *Methods*, 68(1), 134-139. doi:10.1016/j.ymeth.2014.03.014
- 505 Milan, M. (2002). Survival of the fittest. Cell competition in the *Drosophila* wing. *EMBO Rep*,  
506 3(8), 724-725. doi:10.1093/embo-reports/kvf151
- 507 Mills, E. W., & Green, R. (2017). Ribosomopathies: There's strength in numbers. *Science*,  
508 358(6363). doi:10.1126/science.aan2755
- 509 Morata, G., & Ripoll, P. (1975). Minutes: mutants of *drosophila* autonomously affecting cell  
510 division rate. *Dev Biol*, 42(2), 211-221. doi:10.1016/0012-1606(75)90330-9

- 511 Moreno, E., & Basler, K. (2004). dMyc transforms cells into super-competitors. *Cell*, *117*(1),  
512 117-129. doi:10.1016/s0092-8674(04)00262-4
- 513 Nagata, R., Nakamura, M., Sanaki, Y., & Igaki, T. (2019). Cell Competition Is Driven by  
514 Autophagy. *Dev Cell*, *51*(1), 99-112 e114. doi:10.1016/j.devcel.2019.08.018
- 515 Nezis, I. P., Simonsen, A., Sagona, A. P., Finley, K., Gaumer, S., Contamine, D., . . . Brech, A.  
516 (2008). Ref(2)P, the Drosophila melanogaster homologue of mammalian p62, is  
517 required for the formation of protein aggregates in adult brain. *J Cell Biol*, *180*(6),  
518 1065-1071. doi:10.1083/jcb.200711108
- 519 Novoa, I., Zeng, H., Harding, H. P., & Ron, D. (2001). Feedback inhibition of the unfolded  
520 protein response by GADD34-mediated dephosphorylation of eIF2alpha. *J Cell Biol*,  
521 *153*(5), 1011-1022. doi:10.1083/jcb.153.5.1011
- 522 Ohno, M. (2014). Roles of eIF2alpha kinases in the pathogenesis of Alzheimer's disease.  
523 *Front Mol Neurosci*, *7*, 22. doi:10.3389/fnmol.2014.00022
- 524 Oliver, E. R., Saunders, T. L., Tarle, S. A., & Glaser, T. (2004). Ribosomal protein L24 defect in  
525 belly spot and tail (Bst), a mouse Minute. *Development*, *131*(16), 3907-3920.  
526 doi:10.1242/dev.01268
- 527 Pajares, M., Cuadrado, A., & Rojo, A. I. (2017). Modulation of proteostasis by transcription  
528 factor NRF2 and impact in neurodegenerative diseases. *Redox Biol*, *11*, 543-553.  
529 doi:10.1016/j.redox.2017.01.006
- 530 Recasens-Alvarez, C., Alexandre, C., Kirkpatrick, J., Nojima, H., Huels, D. J., Snijders, A. P., &  
531 Vincent, J. P. (2021). Ribosomopathy-associated mutations cause proteotoxic stress  
532 that is alleviated by TOR inhibition. *Nat Cell Biol*. doi:10.1038/s41556-020-00626-1
- 533 Reinke, A. W., Baek, J., Ashenberg, O., & Keating, A. E. (2013). Networks of bZIP protein-  
534 protein interactions diversified over a billion years of evolution. *Science*, *340*(6133),  
535 730-734. doi:10.1126/science.1233465
- 536 Rubinsztein, D. C. (2006). The roles of intracellular protein-degradation pathways in  
537 neurodegeneration. *Nature*, *443*(7113), 780-786. doi:10.1038/nature05291
- 538 Skibinski, G., Hwang, V., Ando, D. M., Daub, A., Lee, A. K., Ravisankar, A., . . . Finkbeiner, S.  
539 (2017). Nrf2 mitigates LRRK2- and alpha-synuclein-induced neurodegeneration by  
540 modulating proteostasis. *Proc Natl Acad Sci U S A*, *114*(5), 1165-1170.  
541 doi:10.1073/pnas.1522872114
- 542 Sykiotis, G. P., & Bohmann, D. (2008). Keap1/Nrf2 signaling regulates oxidative stress  
543 tolerance and lifespan in Drosophila. *Dev Cell*, *14*(1), 76-85.  
544 doi:10.1016/j.devcel.2007.12.002
- 545 Tamori, Y., Bialucha, C. U., Tian, A. G., Kajita, M., Huang, Y. C., Norman, M., . . . Fujita, Y.  
546 (2010). Involvement of Lgl and Mahjong/VprBP in cell competition. *PLoS Biol*, *8*(7),  
547 e1000422. doi:10.1371/journal.pbio.1000422
- 548 Tsurui-Nishimura, N., Nguyen, T. Q., Katsuyama, T., Minami, T., Furuhashi, H., Oshima, Y., &  
549 Kurata, S. (2013). Ectopic antenna induction by overexpression of CG17836/Xrp1  
550 encoding an AT-hook DNA binding motif protein in Drosophila. *Biosci Biotechnol*  
551 *Biochem*, *77*(2), 339-344. doi:10.1271/bbb.120756
- 552 Vincent, J. P., Kolahgar, G., Gagliardi, M., & Piddini, E. (2011). Steep differences in wingless  
553 signaling trigger Myc-independent competitive cell interactions. *Dev Cell*, *21*(2), 366-  
554 374. doi:10.1016/j.devcel.2011.06.021
- 555 Vishwakarma, M., & Piddini, E. (2020). Outcompeting cancer. *Nat Rev Cancer*, *20*(3), 187-  
556 198. doi:10.1038/s41568-019-0231-8
- 557
